# Supplementary material
Source: PubMed Central journal article supplement (PMC5611636)
Supplement: mmc1.pdf [file mmc1.pdf]

**Biophysical Journal, Volume 113**

**Supplemental Information**

**Effect of a Paramagnetic Spin Label on the Intrinsically Disordered Peptide Ensemble of Amyloid- $\beta$**

**Sukanya Sasmal, James Lincoff, and Teresa Head-Gordon**

## Supplementary Information: The Effect of a Paramagnetic Spin Label on the Intrinsically Disordered Peptide Ensemble of Amyloid- $\beta$

*S. Sasmal, J. Lincoff, T. Head-Gordon*

### FIGURE CAPTIONS

**Figure S1.** Percentages of MTSL-Cys-A $\beta$ 42 sub-ensembles containing turn 32-33 for REMD simulations.

**Figure S2.** Plot of the probability of a heavy atom contact between the MTSL-Cys residue and other residues in the A $\beta$ 42 sequence for REMD simulations.

**Figure S3:** Calculated SHIFTX2<sup>2</sup> proton and carbon secondary chemical shifts by residue for A $\beta$ 42 (blue) and MTSL-Cys-A $\beta$ 42 (red) REMD simulations. (a) H $_{\alpha}$  chemical shifts, (b) H $_{N}$  chemical shifts, (c) C $_{\alpha}$  chemical shifts, (d) C $_{\beta}$  chemical shifts, and (e) N chemical shifts. Random coil residue specific values taken from are subtracted from both experimental and simulation values.

**Figure S4:** J-coupling constants for backbone amides for A $\beta$ 42 (blue) and MTSL-Cys-A $\beta$ 42 (red) for REMD simulations. Simulation uncertainty bars represent rms difference between two independent simulations and the average.

**Figure S5:** Calculated RDCs for (a) A $\beta$ 42 and (b) MTSL-Cys-A $\beta$ 42 structural ensembles generated using REMD simulations. RDCs based on global alignments calculated from PALES.

**Figure S6:** Contact map of strong simulated <sup>1</sup>H<sup>1</sup>H NOE intensities for MTSL-Cys-A $\beta$ 42 from REMD simulations that are dominated by a single contact. Strong experimental intensities that define  $\beta$ -strands 4-7 and 10-12 (orange),  $\beta$ -strands 3-6 and 31-41 (pink),  $\beta$ -strands 16-21 and 29-36 (cyan),  $\beta$ -strands 27-31 and 33-38 (grey),  $\beta$ -strands 34-36 and 39-40 (yellow) and hydrophobic contacts (outlined black) indicated in the map. The color-coding for helices and turns are shown in the figure.

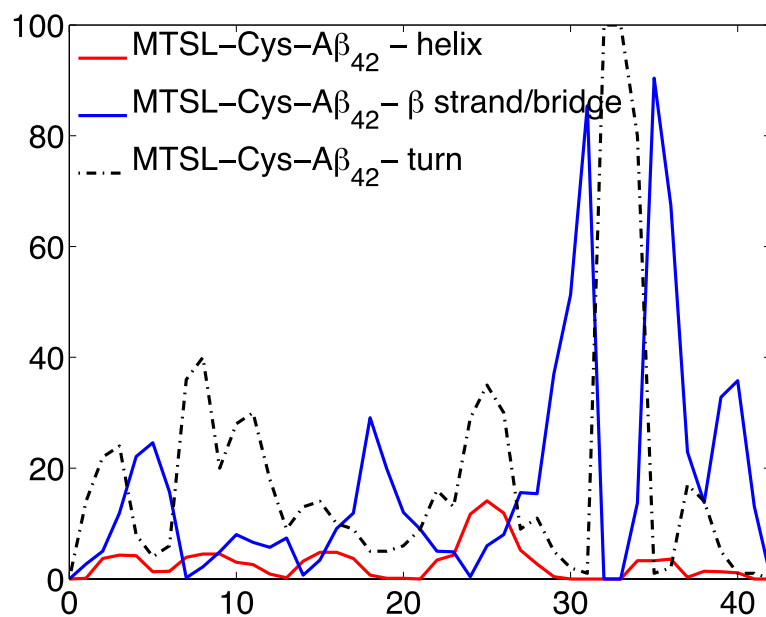

**Figure S1:** Percentages of MTSL-Cys-A $\beta$ 42 sub-ensembles containing turn 32-33 for REMD simulations.

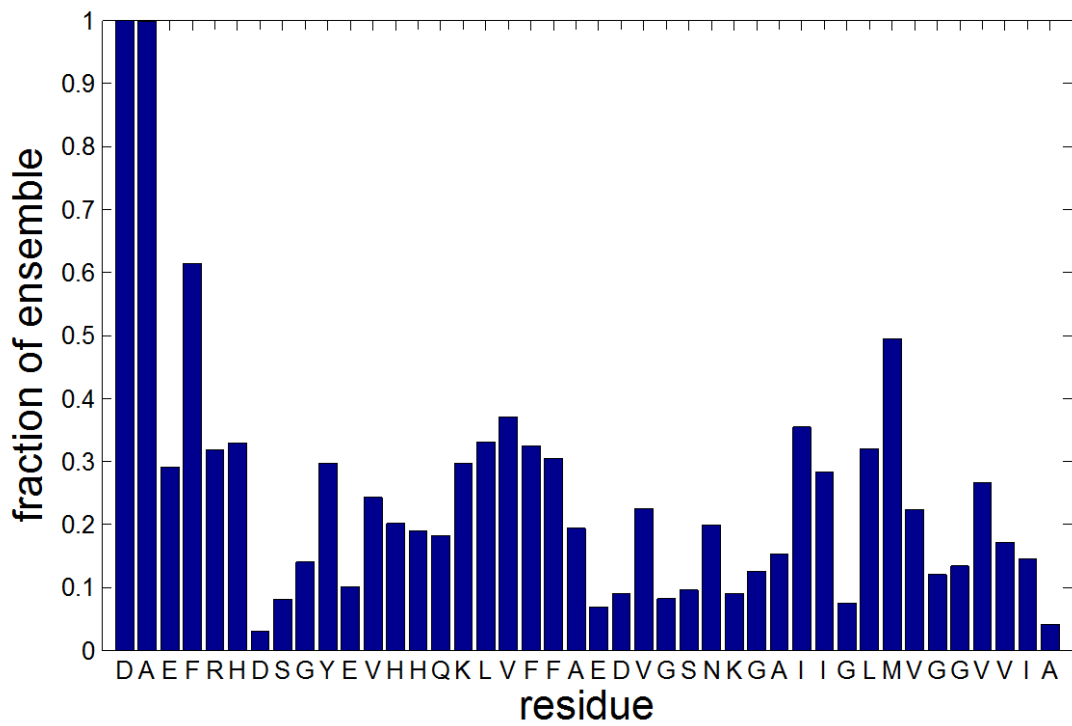

**Figure S2:** Plot of the probability of a heavy atom contact between the MTSL-Cys residue and other residues in the A $\beta$ 42 sequence for REMD simulations.

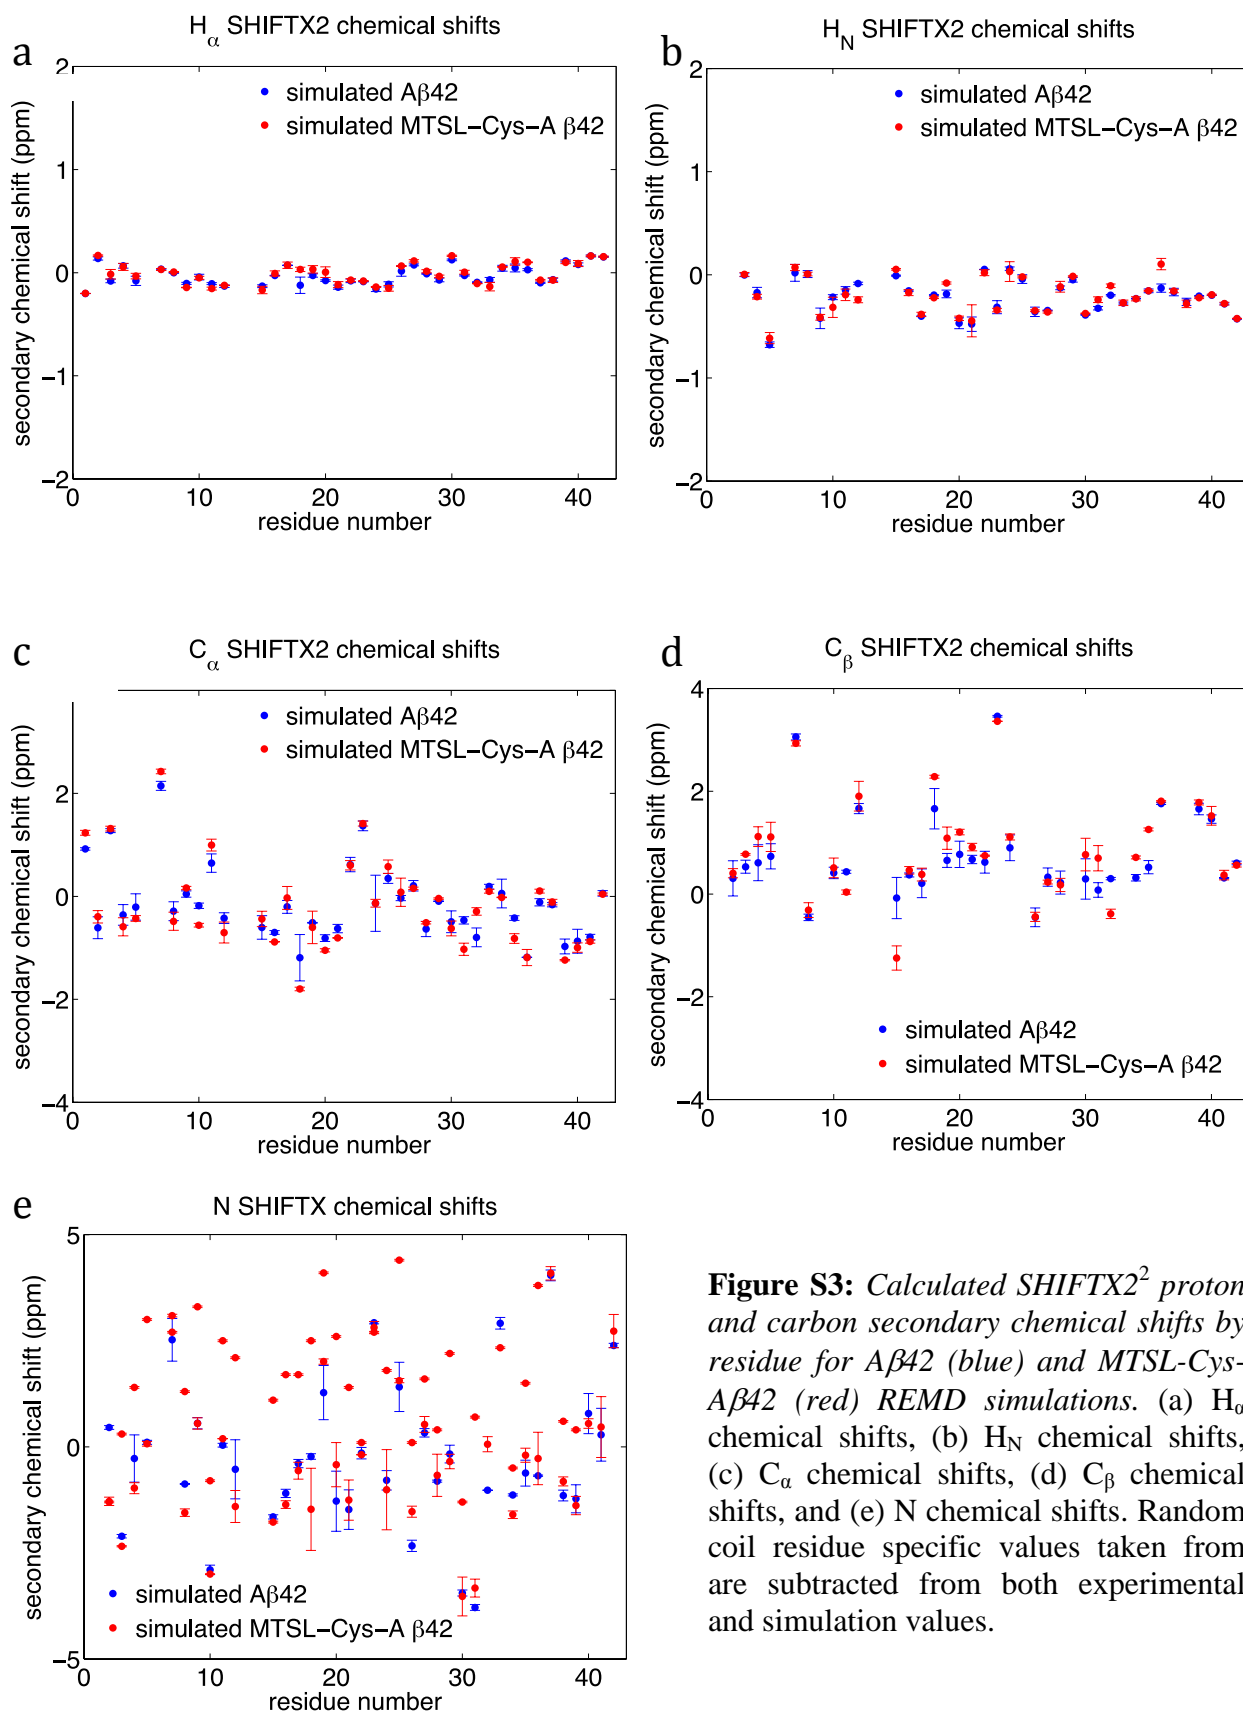

**Figure S3:** Calculated SHIFTX<sup>2</sup> proton and carbon secondary chemical shifts by residue for A $\beta$ 42 (blue) and MTSL-Cys-A $\beta$ 42 (red) REMD simulations. (a)  $H_{\alpha}$  chemical shifts, (b)  $H_N$  chemical shifts, (c)  $C_{\alpha}$  chemical shifts, (d)  $C_{\beta}$  chemical shifts, and (e) N chemical shifts. Random coil residue specific values taken from are subtracted from both experimental and simulation values.

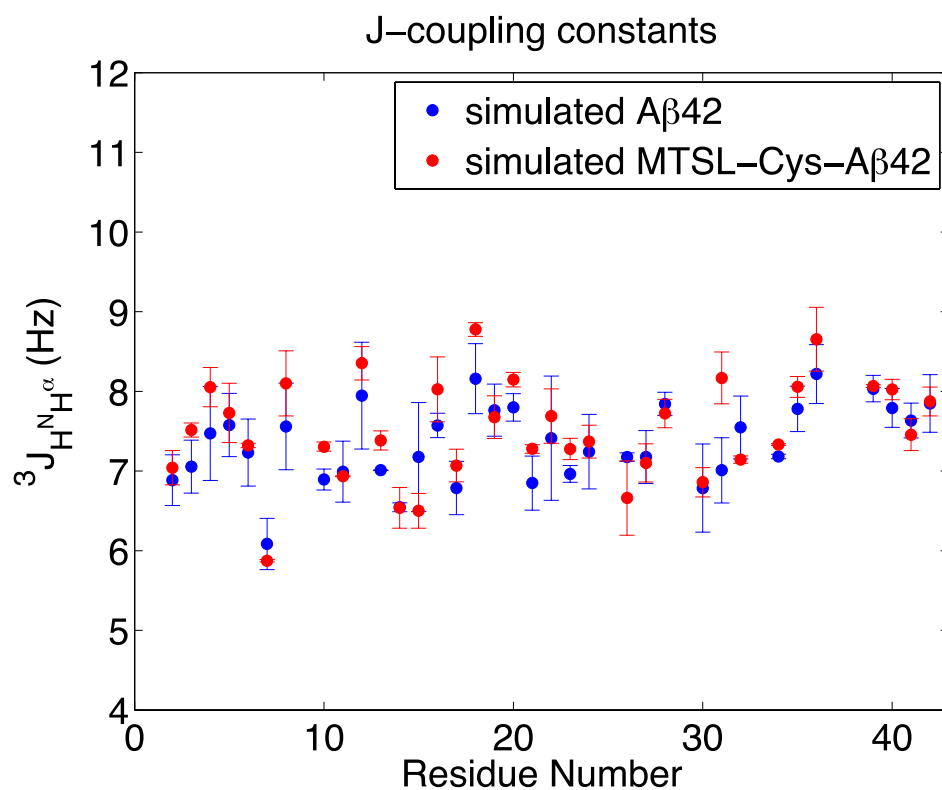

**Figure S4:** *J*-coupling constants for backbone amides for A $\beta$ 42 (blue) and MTSL-Cys-A $\beta$ 42 (red) for REMD simulations. Simulation uncertainty bars represent rms difference between two independent simulations and the average.

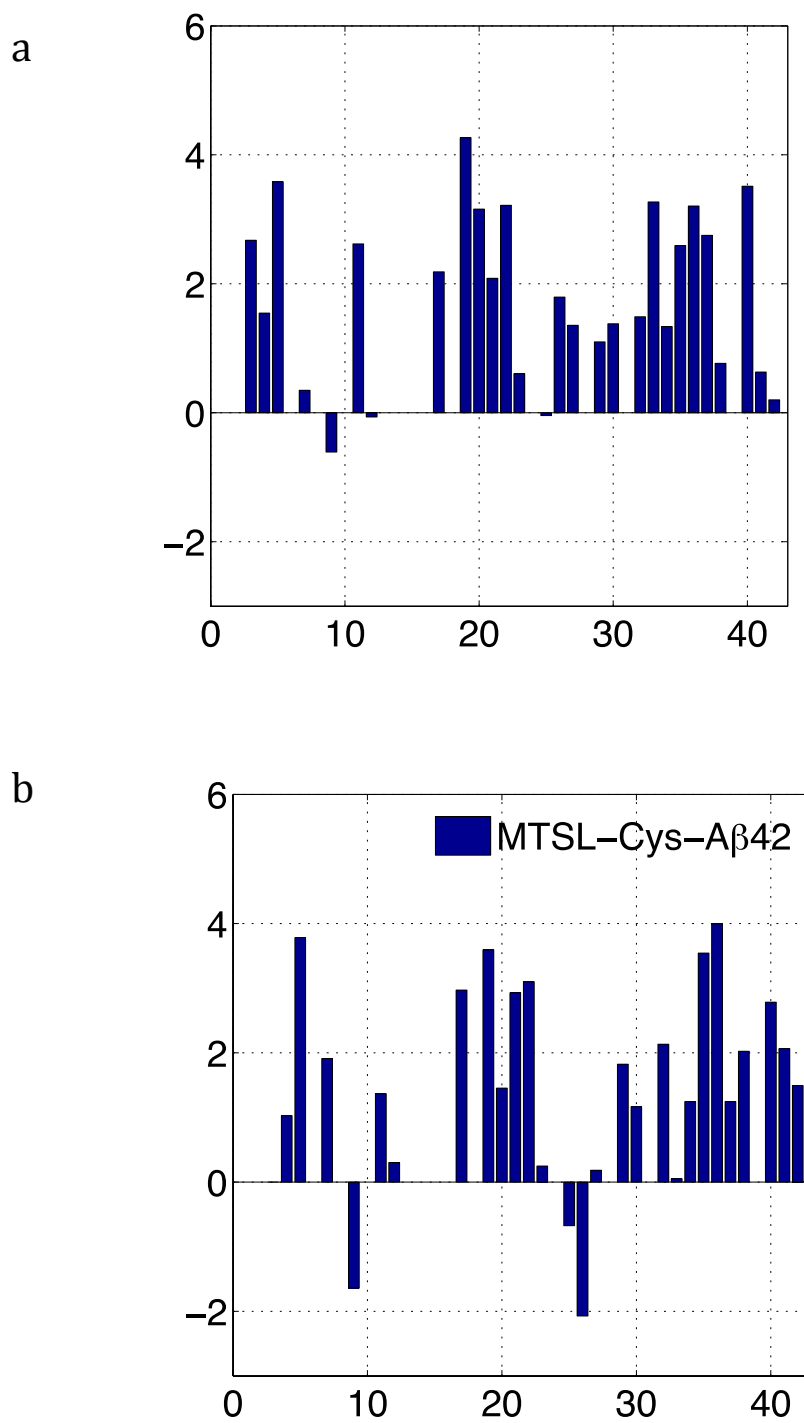

**Figure S5:** Calculated RDCs for (a) A $\beta$ 42 and (b) MTSL-Cys-A $\beta$ 42 structural ensembles generated using REMD simulations. RDCs based on global alignments calculated from PALES<sup>3</sup>.

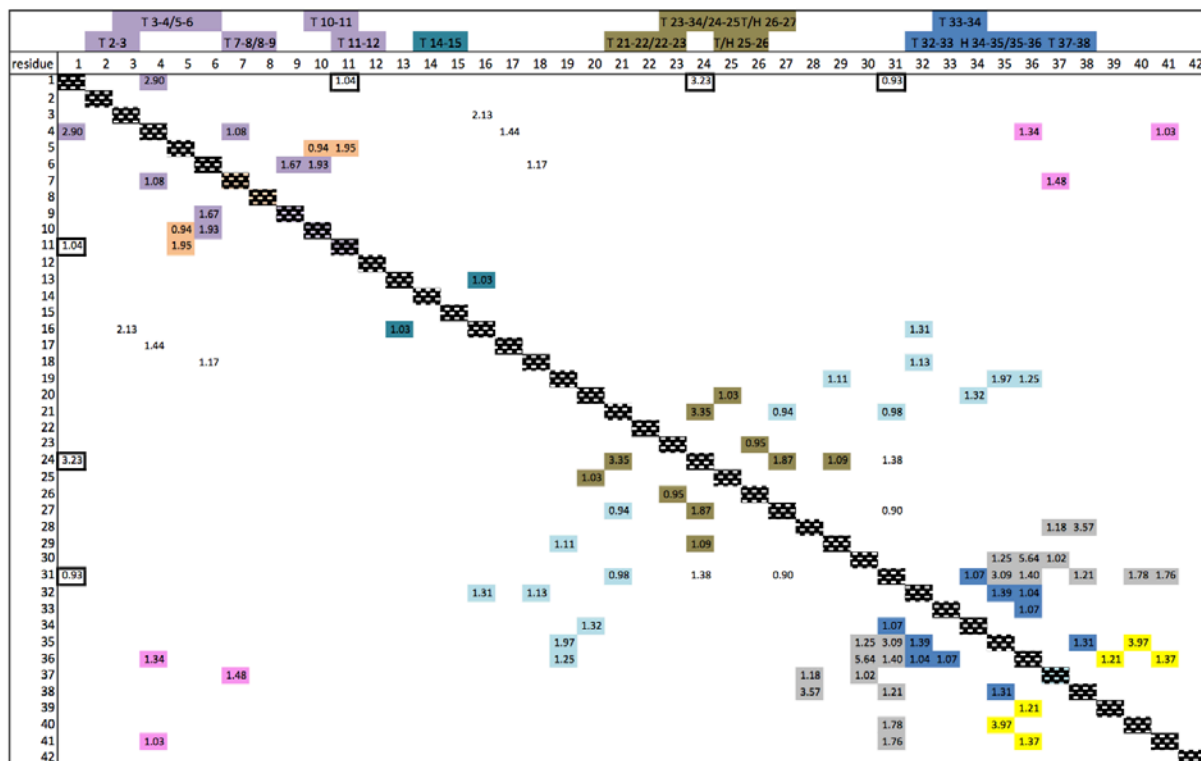

**Figure S6:** Contact map of strong simulated  $^1\text{H}^1\text{H}$  NOE intensities for MTSL-Cys- $\text{A}\beta_{42}$  from REMD simulations that are dominated by a single contact. Strong experimental intensities that define  $\beta$ -strands 4-7 and 10-12 (orange),  $\beta$ -strands 3-6 and 31-41 (pink),  $\beta$ -strands 16-21 and 29-36 (cyan),  $\beta$ -strands 27-31 and 33-38 (grey),  $\beta$ -strands 34-36 and 39-40 (yellow) and hydrophobic contacts (outlined black) indicated in the map. The color-coding for helices and turns are shown in the figure.



## REFERENCES:

1. Peter, C.; Daura, X.; van Gunsteren, W. F., Calculation of NMR-relaxation parameters for flexible molecules from molecular dynamics simulations. **2001** *J. Biomol. NMR* 20, 297–310.
2. Han, B.; Liu, Y.; Ginzinger, S. W.; Wishart, D. S., SHIFTX2: significantly improved protein chemical shift prediction. **2011** *J. Biomol. NMR* 50 (1), 43–57.
3. Zweckstetter, M.; Bax, A., Prediction of sterically induced alignment in a dilute liquid crystalline phase: Aid to protein structure determination by NMR. **2000** *J. Am. Chem. Soc.* 122 (12), 3791–3792.
